# Supplementary material
Source: Springer Nature journal article supplement (https://www.springermedizin.de/resource/supplementary/13058_2013_3420_MOESM8_ESM.pdf/9704130)
Supplement: MOESM8 [file 9704130]

**Additional file 8:** Most significantly upregulated and downregulated genes in PHBECs in *ex vivo* co-cultures.

| Gene_ID      | logFC_CCE-MCE | pVal_CCE-MCE | Description                                                         |
|--------------|---------------|--------------|---------------------------------------------------------------------|
| ELOVL7       | 2.035469      | 0.001263     | ELOVL family member 7, elongation of long chain fatty acids (yeast) |
| LOC100131541 | 2.020525      | 0.00028      | hypothetical LOC100131541                                           |
| MIR34A       | 1.47331       | 0.001561     | microRNA 34a                                                        |
| DTX2         | 1.466542      | 0.000477     | deltex homolog 2 (Drosophila)                                       |
| MIR30E       | 1.437259      | 0.004363     | microRNA 30e                                                        |
| LY6G5B       | 1.376098      | 0.003527     | lymphocyte antigen 6 complex, locus G5B                             |
| DAB2         | 1.205069      | 0.000163     | disabled homolog 2, mitogen-responsive phosphoprotein (Drosophila)  |
| BCL2L1       | 1.112348      | 0.002831     | BCL2-like 1 (BCLX, BCL-XL)                                          |
| HTR1D        | 1.090916      | 0.003013     | 5-hydroxytryptamine (serotonin) receptor 1D                         |
| CLK2P        | 1.066583      | 0.002706     | CDC-like kinase 2, pseudogene                                       |
| C6orf64      | 1.045358      | 0.000967     | chromosome 6 open reading frame 64                                  |
| SNRPN        | -4.17541      | 0.000525     | small nuclear ribonucleoprotein polypeptide N                       |
| SNORD50A     | -3.37755      | 0.000603     | small nucleolar RNA, C/D box 50A                                    |
| NCAPG        | -2.57053      | 0.001031     | non-SMC condensin I complex, subunit G                              |

|           |          |          |                                                                                       |
|-----------|----------|----------|---------------------------------------------------------------------------------------|
| SNORD38B  | -2.44372 | 0.004579 | small nucleolar RNA, C/D box 38B                                                      |
| DTL       | -2.32172 | 0.000162 | denticleless homolog (Drosophila)                                                     |
| RNASEH1   | -2.22394 | 0.003523 | ribonuclease H1                                                                       |
| HIST1H2BI | -1.82815 | 0.000601 | histone cluster 1, H2bi                                                               |
| LRAT      | -1.81516 | 0.002081 | lecithin retinol acyltransferase (phosphatidylcholine--retinol O-acyltransferase)     |
| CTR9      | -1.78041 | 0.000584 | Ctr9, Paf1/RNA polymerase II complex component, homolog (S. cerevisiae)               |
| LRRC37A2  | -1.53067 | 0.002527 | leucine rich repeat containing 37, member A2                                          |
| SPANXA2   | -1.50638 | 0.000466 | SPANX family, member A2                                                               |
| HELLS     | -1.38695 | 0.004072 | helicase, lymphoid-specific                                                           |
| POLD3     | -1.36429 | 0.00155  | polymerase (DNA-directed), delta 3, accessory subunit                                 |
| CA5B      | -1.35463 | 0.001753 | carbonic anhydrase VB, mitochondrial                                                  |
| KIAA1586  | -1.33864 | 0.001957 | KIAA1586                                                                              |
| SCYL3     | -1.33287 | 0.001241 | SCY1-like 3 (S. cerevisiae)                                                           |
| ERCC4     | -1.29095 | 0.002365 | excision repair cross-complementing rodent repair deficiency, complementation group 4 |
| BRIP1     | -1.25474 | 1.18E-05 | BRCA1 interacting protein C-terminal helicase 1                                       |
| LSM6      | -1.23915 | 0.002825 | LSM6 homolog, U6 small nuclear RNA associated (S. cerevisiae)                         |
| GLTSCR2   | -1.22346 | 0.001803 | glioma tumor suppressor candidate region gene 2                                       |

|          |          |          |                                                                                  |
|----------|----------|----------|----------------------------------------------------------------------------------|
| HMGB2    | -1.18979 | 0.002779 | high-mobility group box 2                                                        |
| TIMP1    | -1.16642 | 0.000645 | TIMP metalloproteinase inhibitor 1                                               |
| COPZ2    | -1.16295 | 0.003243 | coatamer protein complex, subunit zeta 2                                         |
| XPO6     | -1.15291 | 0.000856 | exportin 6                                                                       |
| ZFYVE16  | -1.14447 | 2.09E-05 | zinc finger, FYVE domain containing 16                                           |
| PTPRZ1   | -1.13278 | 0.001864 | protein tyrosine phosphatase, receptor-type, Z polypeptide 1                     |
| KCTD14   | -1.09396 | 0.001772 | potassium channel tetramerisation domain containing 14                           |
| KIAA1598 | -1.08906 | 0.004336 | KIAA1598                                                                         |
| DPYD     | -1.07097 | 0.001397 | dihydropyrimidine dehydrogenase                                                  |
| C21orf91 | -1.05873 | 0.002727 | chromosome 21 open reading frame 91                                              |
| POGK     | -1.05455 | 0.001731 | pogo transposable element with KRAB domain                                       |
| TAF2     | -1.04992 | 0.000708 | TAF2 RNA polymerase II, TATA box binding protein (TBP)-associated factor, 150kDa |
| ZNF562   | -1.02308 | 0.000299 | zinc finger protein 562                                                          |
| LBR      | -1.02224 | 0.001805 | lamin B receptor                                                                 |
| CDC7     | -1.01102 | 0.004452 | cell division cycle 7 homolog ( <i>S. cerevisiae</i> )                           |
| CALML4   | -1.00426 | 0.003622 | calmodulin-like 4                                                                |
| CCDC41   | -1.0008  | 0.001017 | coiled-coil domain containing 41                                                 |
